1 **Title: Poverty Proofing health care: a qualitative study of barriers to accessing health care for low**  
2 **income families with children in Northern England.**

3 **Short title: Barriers to accessing health care for low income families with children in Northern**  
4 **England.**

5 **Authors:**

6 Elaine Bidmead<sup>1,2\*</sup>, Louise Hayes<sup>3</sup>, Emma Leggott<sup>4</sup>, Josephine Wildman<sup>5, 2, #a</sup>, Judith Rankin<sup>5,2</sup>, Luke  
7 Bramhall<sup>4</sup>, Liz Todd<sup>6</sup>, Laura Mazzoli-Smith<sup>7</sup>

8 <sup>1</sup> Institute of Health, University of Cumbria, Carlisle, Cumbria, United Kingdom.

9 <sup>2</sup> National Institute for Health and Care Research (NIHR) Applied Research Collaboration (ARC), North  
10 East and North Cumbria, Newcastle Upon Tyne, Tyne and Wear, United Kingdom.

11 <sup>3</sup> National Institute for Health and Care Research (NIHR) Research Development Service (RDS) North  
12 East and North Cumbria, Population Health Sciences Institute, Newcastle University, Newcastle upon  
13 Tyne, Tyne and Wear, United Kingdom,

14 <sup>4</sup> Children North East, Newcastle upon Tyne, Tyne and Wear, United Kingdom.

15 <sup>5</sup> Population Health Sciences Institute, Newcastle University, Newcastle upon Tyne, Tyne and Wear,  
16 United Kingdom.

17 <sup>6</sup> School of Education, Communication and Language Sciences, Newcastle University, Newcastle upon  
18 Tyne, United Kingdom.

19 <sup>7</sup> School of Education, Durham University, Durham, County Durham, United Kingdom.

20 <sup>#a</sup>Current address: ScotCen Social Research, Edinburgh, Scotland.

21 \*Corresponding author

22 [elaine.bidmead@cumbria.ac.uk](mailto:elaine.bidmead@cumbria.ac.uk)

23 **Abstract**

24 Poverty impacts negatively on children's health and future life chances. Access to the UK's National  
25 Health Service (NHS) is based on clinical need rather than the ability to pay but horizontal inequities  
26 in access exist. Children North East, a charity supporting children experiencing poverty, wanted to  
27 develop a Poverty Proofing© Health tool to help NHS services reduce the impacts of poverty on  
28 access. This study aimed to understand barriers to healthcare access faced by families living on low  
29 incomes to support development of the tool. Twenty parents and seven Voluntary Community Social  
30 Enterprise sector staff participated in qualitative interviews or focus groups. Data were analysed  
31 thematically, and three main themes were identified as impacting access to health care: hidden  
32 costs, securing appointments and developing relationships with health care providers. We conclude  
33 that low-income families experience both financial and other barriers to accessing NHS health care  
34 and that these barriers are exacerbated for low income families living in rural areas.

35

36 **1. Introduction**

37 Poverty is a major determinant of health and life opportunities that impacts negatively on children's  
38 futures. Poverty occurs when people's resources are well below their minimum needs [1]. A recent  
39 UK report shows that 'children born into the poorest fifth of families in the UK are almost 13 times  
40 more likely to experience poor health and educational outcomes by the age of 17 years' [2]. Children  
41 experiencing poverty are at greater risk of becoming overweight, developing asthma and having  
42 tooth decay, as well as performing poorly at school [3]. Poverty also increases the risk of poor mental  
43 health [4] and early adulthood mortality [5,6]. Children and young people in the UK report that  
44 poverty has a negative effect on their wellbeing and causes feelings of exclusion, shame and  
45 unfairness [7].

46 In 2021-2022, 29% of UK children lived in poverty [8]. In June 2023 the figure was substantially  
47 higher (35%) in the North East of England [9]. Poverty is a significant cause of the UK North-South  
48 divide in children's life chances as it limits access to the circumstances that help to ensure good  
49 health [10].

50 Children North East (CNE) is a charitable organisation founded to support children living in poverty. In  
51 2011, children working with CNE identified an end to discrimination in school as their main priority.  
52 In response, CNE, with support from the North East Child Poverty Commission, developed 'Poverty  
53 Proofing© the school day'. This is an audit and action-plan development tool for schools which aims  
54 to remove poverty-related barriers to learning [11]. Following several successful implementations,  
55 the North East and North Cumbria Child Health and Wellbeing Network expressed an interest in  
56 developing Poverty Proofing approaches for health care settings.

57 Access to the UK's National Health Service (NHS) is based on clinical need rather than an individual's  
58 ability to pay. It is free at the point of delivery irrespective of financial circumstances. However,  
59 'horizontal inequities' exist in health care utilisation [12]. While poorer health in poorer people  
60 results in them consuming more health care (at every age), richer people tend to access health care  
61 at an earlier stage and consume more preventive and specialist care [12, 13].

62 This study aimed to identify barriers to health care access among families with children living on low  
63 incomes (commonly defined in the UK as below 60% of the median income [14]) with the objective  
64 of designing an action-plan toolkit for Poverty Proofing a range of health care settings. The work was  
65 conducted during a period when the NHS was experiencing service pressures due to increased  
66 demand from COVID-19, workforce issues, and the impacts of austerity. Comments during data  
67 collection made clear that these pressures had created a situation in which access to health services  
68 (such as appointments with dentists, General Practitioners (GPs) and hospitals) was challenging for  
69 many people, irrespective of financial circumstance. In this paper we focus on issues impacting

70 access to health care that are amplified by low-income. The results presented informed the  
71 development of a Poverty Proofing audit tool.

## 72 **2. Material and methods**

73 The COnsolidated criteria for Reporting Qualitative research (COREQ) [15] were used to guide our  
74 research design; our COREQ checklist is attached as appendix A.

75

### 76 **2.1 Sample and Recruitment**

77 Data collection was undertaken with parents on low-incomes and with professionals working in the  
78 Voluntary, Community and Social Enterprise (VCSE) sector who support people on low-incomes.

79 Parent participants were purposively recruited via VCSE organisations in the North East and North  
80 Cumbria. VCSE organisations were supplied with study information sheets which they shared with  
81 service users they identified as experiencing low-income (number unknown). Participants were  
82 offered a £20 gift voucher to thank them for their contribution. Twenty parents volunteered; none  
83 were known previously to the researchers.

84 Three VCSE organisations working in health and wellbeing were contacted by email, supplied with a  
85 study information sheet, and invited to contribute to the research. Organisations were offered  
86 compensation of £20 per person participating. Eight staff members volunteered to participate. All  
87 were based in North Cumbria and two were known to EB previously.

88 No participants dropped out. The number of parents/VCSE staff choosing not to participate is  
89 unknown.

### 90 **2.2 Ethics**

91 Ethical approval for the study was granted by Newcastle University Research Ethics Committee  
92 (Reference: 2236/15258 Date: 23/11/2021).

93 All participants were provided with written and verbal information about the study and invited to ask  
94 questions prior to participating; all provided written informed consent before taking part.

### 95 **2.3 Theory, design and setting**

96 This study employed a critical realist, contextualist approach to gather and understand participants'  
97 situated experiences of accessing NHS health services whilst living on low incomes.

98 A topic guide was devised to structure and facilitate in-depth one-to-one interviews and focus  
99 groups; it was piloted with two parents and no amendments were made. The topic guide prompted  
100 participants to think about different aspects of health care, including getting appointments,  
101 accessing appointments, emergency situations, and staff attitudes; it also allowed participants to  
102 introduce issues significant to them.

103 The research was undertaken by EB and LH. Both are female, mid-career researchers (educated to  
104 PhD level) trained and experienced in qualitative data collection methods and analysis. Researchers  
105 shared with participants their names, job roles, qualifications, and reasons for doing the research.

106 One round of data collection was undertaken. Interviews with parents were conducted via online  
107 video using Microsoft Teams or Zoom, six by LH and one by EB. Interviews lasted between 15 and 60  
108 minutes and were recorded and fully transcribed. Three parent focus groups were conducted in  
109 community venues and facilitated in person by LH. Parent focus groups lasted between 40 and 60  
110 minutes; two were audio-recorded and fully transcribed; notes were taken in the third. The  
111 interview and two focus groups with VCSE staff were conducted by EB via online video using  
112 Microsoft Teams, they lasted between 60 and 80 minutes and were recorded and fully transcribed.  
113 No others were present during data collection besides the researchers and participants. Transcripts  
114 were not shared with participants.

### 115 **2.4 Timescale**

116 Data were collected between December 2021 and March 2022.

## 117 **2.5 Analysis**

118 Anonymised transcripts were analysed using ‘reflexive thematic analysis’ [16]. Following  
119 familiarisation with the data, a sample of six transcripts were independently coded by two  
120 researchers (EB and LH), inductive codes emerged from the data; deductive codes aligned with the  
121 topic guide. The two researchers then met to discuss codes and construct initial themes. Having  
122 agreed the coding frame all transcripts were coded by one researcher (EB) using NVIVO. Following  
123 coding, initial themes and coded data were discussed at team meetings and the main themes were  
124 agreed. EB and LH drafted the paper except for the discussion which was drafted by EL. The paper  
125 was reviewed by JR then commented on and agreed by the study team and finalised.

## 126 **3. Results**

127 Semi-structured interviews were conducted with six parents (all mothers) aged between 20-60 years,  
128 four of whom were lone parents. Thirteen parents (12 mothers and one father), aged 20-40 years,  
129 participated in one of three focus group discussions. Seven staff took part in focus group discussions  
130 and one in a semi-structured interview; all were female and aged over 30 years. The results  
131 presented below include quotations to provide rich and faithful accounts; each transcript was given  
132 an identity code to indicate whether data came from a parent interview (ParentInt), parent focus  
133 group (ParentsFG), VCSE interview (VCSEInt) or VCSE focus group (VCSEFG).

134 Contributors commented on the challenges of living in poverty which we discuss first. Next, we  
135 present thematic findings. We identified three main themes: hidden costs, securing appointments  
136 and developing relationships with health care providers. We then discuss contributors’ awareness of  
137 sources of financial assistance for accessing health care followed by contributors’ suggestions for  
138 improvements.

### 139 **3.1 Living on a low income**

140 Some parents shared the challenges of living with financial hardship. It was typically described as  
141 hard, stressful, embarrassing and stigmatising:

142 “It's a big struggle on a on a day-to-day basis ... It's like this week it's my, my poor week as I  
143 call it, I get like £63 today to last me a week and out of that I've got my bills to pay, my food  
144 to pay ... it's just impossible to live on.” (ParentInt1)

145 Participants in ParentsFG4 spoke about the embarrassment felt at having to ask for assistance due to  
146 financial hardship. ParentInt2 shared the stigmatising effects of poverty: “stigma about people  
147 claiming benefits, and ‘*Oh, you're useless,*’ and, ‘*You're timewasters and scroungers.*” They stressed  
148 that they had always worked until their child was born with significant health needs and explained  
149 that they were “quite proud”; being asked to prove they were in need was highly embarrassing to  
150 them, for example:

151 “You either have to print off a statement, which to me is embarrassing, because it's got every  
152 bit of how they break down how much you're going to get paid ... the other thing that I find  
153 quite embarrassing is, if, for example, my son's admitted into hospital, ... they'll ask me about  
154 what our situation is. Do I work or don't I work? And do we have social worker? ... And I feel  
155 that's quite probing ... I think there's a lot of things that could be improved on, to make you  
156 feel not as scummy about the way you are.” (ParentInt2)

157 VCSE contributors described what living in poverty meant to them. Descriptions highlighted both  
158 absolute poverty (reliance on food and clothing banks) and relative poverty (having to do without  
159 luxuries, holidays, family days out etc.). Living in financial hardship was thought to impact people's  
160 long-term health and resilience due to poor diet and limited social engagement (VCSEFG1). VCSE  
161 contributors also emphasised the stress caused by poverty and the complex, layering and cumulative  
162 impacts it has on families, which can become overwhelming.

163 “Poverty ... It's an overwhelm with lots of different factors that eat you away, until you feel  
164 like you have few options.” (VCSEInt1)

165 “It's bad enough if you have a child with a physical need ... If you add on the fact that if  
166 there's poverty and you've got a battle with the health system ... you know it's all about  
167 those layers.” (VCSEFG2)

168 Like parents, VCSE contributors highlighted people’s embarrassment about their financial situations  
169 because “families often feel judged” (VCSEFG2). Consequently, some attempt to hide or disguise the  
170 effects poverty has on their lives.

171 VCSEFG2 pointed to situations where the impacts of poverty may be misconstrued and understood  
172 instead as neglect. For example, one participant highlighted the practice of setting targets for  
173 parents during Child Protection or Child in Need Plan meetings, such as attending health  
174 appointments. They noted “if you weren't actually able to access the appointment because of  
175 difficulties getting there” then that may be seen as the parent not complying:

176 “Some families will go down the I can't afford it. Others won't say that because they'll be  
177 fearful of ‘Well, if you can't afford to go to health ... what's happening there’ and they will  
178 come over as disengaged and difficult when actually they can't, they cannot, actually  
179 manage to get there because of finance.” (VCSEFG2)

## 180 **3.2 Hidden Costs – financial barriers to accessing health care**

### 181 **3.2.1 Transport**

182 Transport costs emerged as a major barrier to accessing health care for low-income families. Most  
183 could access GPs locally and so could attend relatively easily, but attending hospital appointments  
184 often involved longer journeys and several buses if undertaken by public transport, or excessive  
185 parking fees if undertaken by car.



186 Contributors indicated numerous times that the costs of transport to appointments was a concern to  
187 them and these costs increased exponentially for parents with multiple appointments, living in  
188 remote/rural areas, or having to travel long distances to access secondary care. There were also  
189 significant time implications for parents living in remote areas without access to a vehicle, one  
190 parent from a rural village elaborated:

191 “It's about 25, 26 mile away so like I say to get to [large town], you've either got to get a taxi  
192 ... to [small town] and then a train ... to [large town] ... or get a bus which takes about 45  
193 minutes. The train takes about 10 minutes, but they don't run as often ... For a taxi into  
194 [small town] its £15 each way ... The train I think it's about £7 or £8 return now ... for both of  
195 us, you're looking, by the time you get taxis and that, you're looking at 50 odd pound before  
196 you even get to the appointment [...] So, you have to cancel appointments or work around  
197 it.” (ParentInt1)

198 In rural areas, people may be required to access secondary care at sites across the region,  
199 irrespective of where they live. Where people are referred is determined by the availability of  
200 appointments. However, people on low incomes face the dilemma of covering significant costs or  
201 delaying their health care:

202 “Where health authorities are trying to squeeze you in for an appointment and not make  
203 you wait, they will offer you say [hospital name] for example ... for some families, that's easy  
204 enough [but] often it's a choice of getting yourself over to another hospital ... taking the day  
205 off work or waiting maybe a month or two, you know, for your child to be seen, which is a  
206 really difficult decision to make [...] they say you aren't forced to go there, you can wait ... so  
207 that while you're not denied health care it will be delayed, not through your lack of  
208 engagement, not through you not putting your health or your children's needs first, it's  
209 because of the affordability of the offer of what your appointment looks like.” (VCSEFG2)

210 When it comes to accessing tertiary care, such challenges are exacerbated. VCSEFG1 commented  
211 upon the number of people in North Cumbria having to travel “out of county” for treatment. For  
212 example, for specialist children’s services, “Newcastle’s the closest or ... it’s Manchester” (VCSEInt1).  
213 This entails expensive and time-consuming travel and potentially lost earnings if time off work is  
214 necessary. One parent in rural North Cumbria highlighted the journeys involved in accessing care for  
215 their child ‘out of county’:

216 “I went to see [consultant], so of course that incurred money for going across to [hospital in  
217 Newcastle], and then he asked for an MRI scan, which [hospital in North Cumbria] did, and  
218 then he sent me an appointment to have an MRI scan done with contrast, but at [another  
219 hospital in Newcastle].” (ParentInt2)

220 This means some people simply cannot afford to attend hospital appointments, a situation that is  
221 compounded where multiple appointments are involved.

### 222 **3.2.2 Subsistence during hospital attendance**

223 Paying for food and drinks during hospital attendance emerged as a significant challenge for parents  
224 who could not afford the costs involved; this was an issue when children were outpatients and  
225 inpatients. Parents highlighted the limited options within hospitals to buy food, and stressed the  
226 expense of hospital food outlets in the North East and North Cumbria:

227 “Hospital food is not affordable ... I just had to find the money. My mam would help us out a  
228 lot. My daughter’s grandad would help. But it is still too much to pay back.” (ParentInt5)

229 “Even getting a cuppa, it’s like a fiver in the hospital.” (ParentsFG5)

230 Costs increased when children were inpatients. It was reported that no food is given to parents  
231 staying with a child, no matter their age. One parent had experienced extended hospital stays when  
232 their baby was born with health complications. They stayed in charitable accommodation at  
233 hospitals; these provided cooking and laundry facilities. However, they did not regularly use these

234 due to financial and time pressures which then impacted their ability to eat healthily; they reported  
235 missing meals and not looking after themselves properly. ParentInt6 noted: “The food in the hospital,  
236 it’s not conducive to low cost” and reported “living on Subway sandwiches and Pot Noodles but I  
237 can’t see it being nutritionally balanced” and that “I try to pack snacks for both of us”.

238 Whilst some preparedness may be expected for planned admissions, this is not possible with  
239 emergency admissions which were reported to trigger even more expenditure. VCSEInt1 highlighted  
240 the realities of emergency admissions for parents:

241 “As we know from our stats, that's likely to be an ambulance admission. So, they're less likely  
242 to have what they need with them. They're less likely to have the people that they need with  
243 them [...] you'd be lucky if you find a vending machine. You'd be lucky if you've got the right  
244 change on you for the vending machine and you'd be lucky if the vending machine's got  
245 anything in it other than tea or coffee. I think you might find that a kind nurse might offer  
246 you a cup of tea and a piece of toast, if they're not rushed off their feet.”

247 This scenario was confirmed by parents, for example:

248 “I didn’t have a budget for when he got rushed into hospital, because nobody knew it was  
249 going to happen. So, then I was borrowing money and things like that, just to travel over  
250 there and back. (ParentInt1)

251 On a positive note, two parents mentioned specific nurses or wards being helpful in terms of  
252 providing food and drinks, but this was dependent on the actions of individual staff members rather  
253 than hospital policy.

### 254 **3.2.3 Discharge from hospital**

255 Participants highlighted the costs associated with discharge from hospital following an admission by  
256 ambulance. This is a particular issue when the emergency department is a significant distance from  
257 home and if discharge occurs when public transport is not operating. Hospital discharge “could be

258 any time of the day; it could be at any time of the night” (VCSEFG2) and “Your only option for getting  
259 home without any transport would be a taxi” (VCSEInt1). Parent5 described attending emergency  
260 departments several times; each visit requiring a taxi. Sometimes their child would be admitted, but  
261 at others they would give medication and discharge them, “so that would be another £30 taxi fare  
262 back home” (ParentInt5).

### 263 **3.2.4 Parking costs**

264 For parents who owned a vehicle parking charges were a concern; they were said to be around “£2  
265 or £3 an hour” which “obviously you don’t have” (ParentFG5). This view was repeated by VCSEFG1  
266 where it was mentioned that “parking is always an issue because of the extra costs parking brings”  
267 which caused stress “because you'd never know how long” you will need. ParentInt2, whose child  
268 was in hospital for several weeks, reported high parking charges when their partner drove from  
269 North Cumbria to Newcastle at weekends. After a time, somebody mentioned cheaper parking that  
270 could be used but this involved using a shuttle bus to the hospital, which took up time and was not  
271 available at weekends.

### 272 **3.2.5 Impacts on income**

273 Some contributors spoke about lost income due to attending appointments with children. ParentInt2  
274 reported losing pay from having to miss work when their child was ill because they did not “qualify  
275 for sick pay”. A contributor in VCSEFG2 highlighted that some families cannot take time off work  
276 because it will affect social security payments.

277 For others, having an ill child had resulted in them losing employment. Contributors in VCSEFG2  
278 talked about several parents who gave up employment because they found working whilst caring for  
279 an ill child impossible and decided it was “too much to be able to juggle all these things and meet my  
280 child's needs”. Another added that “the way that health services shape themselves impacts” because  
281 people must choose between “working or putting children first”; they highlighted “the amount of

282 negotiation you have to do to try and get not every single health appointment in the middle of the  
283 day. You know, it's, it's impossible" (VCSEFG2).

### 284 **3.3 Securing Appointments**

#### 285 **3.3.1 Digital first**

286 The issue of digital access to health services was raised on several occasions, as was the expectation  
287 that everyone has a smart phone or internet access with unlimited calls/data. Parents questioned if  
288 people on low incomes did. For example, whilst some participants at ParentsFG7 noted the easiest  
289 way to get a GP appointment was via an app, one shared that they did not have a smart phone nor  
290 access to a computer.

291 VCSE contributors referred to a digital divide wherein "you are less likely to have a laptop if you  
292 don't have the money" (VCSEFG1). COVID-19 was seen to have accelerated the move to digital first  
293 services, which many people have adapted to over time, but "other people haven't been able to just  
294 because they can't afford it" (VCSEFG1). A participant in VCSEFG2 pointed to the requirement to  
295 have a mobile phone to receive a code that enabled one to access lateral flow tests for COVID-19.  
296 VCSEInt1 noted that:

297 "We absolutely know that the majority of people [experiencing financial hardship] need face  
298 to face engagement because they need to build up trust with their caregiver and ... we do  
299 know that a lot of people will avoid digital connection and will only go for face-to-face  
300 connection because that's the way that they work. That's the way they've always operated."  
301 (VCSEInt1)

#### 302 **3.3.2 GP Appointments**

303 Whilst not directly related to family poverty, almost all participants described difficulties in securing  
304 GP appointments, for example: "not being able to get appointments when you need them ... waiting  
305 weeks and weeks, and weeks" (ParentsFG3). Others reiterated this experience; one "waited two

306 months” for a GP appointment regarding “a water infection” by which time “it was a kidney  
307 infection” (ParentsFG3). VCSE contributors also highlighted the difficulties experienced by service  
308 users in getting appointments due to “massive waitlists, wait times” (VCSEInt1).

309 Having to telephone the surgery for appointments was highlighted as problematic, participants  
310 described waiting on hold for long durations or having to call multiple times:

311 “I was in the queue for half an hour or 45 minutes. And then she said, *‘it’s really busy, I can’t*  
312 *give you an appointment, you can try tomorrow.*” (ParentInt4)

313 “You’re having to ring 30 to 90 times to get through ... I think the record is 124 to get an  
314 appointment one morning.” (ParentInt6)

315 Specific issues with telephone consultations were also reported. Contributors resented having to  
316 wait in for doctors to telephone as “they won’t give you a time for them ringing you back ... you’ve  
317 got to be free all day. If you miss that day, then you’ve really had it” (ParentsFG5). ParentInt1  
318 reported similarly and commented “It stops me from ringing the doctors more times than enough to  
319 be fair” (ParentInt1).

320 Two important factors emerged for low-income families alongside these issues. First was the cost of  
321 being on hold for extended durations. VCSE contributors pointed to an assumption that all patients  
322 have access to free calls on their home or mobile phones and have data for online access, which is  
323 not the case for families facing financial hardship, who are more likely to be on a basic landline tariffs  
324 or pay as you go and have limited data on their mobile phone.

325 “If it's ringing, it's free and people just assume that people don't want that, and they don't  
326 want to be ringing, they want to be in a queue. But ... that starts the pennies ticking for  
327 people who have to pay for their calls.” (VCSEFG2)

328 The second issue to emerge was that these difficulties discouraged people from trying to obtain  
329 appointments, potentially exacerbating conditions, with some choosing to access Accident and  
330 Emergency Departments instead:

331 “They're not even bothering ... because they can't get through to them. So, they won't even  
332 bother ringing, they won't ring for the children, they won't ring for their husbands and won't  
333 ring for themselves anymore and they will go, if it's an emergency, they would go to the  
334 hospital. But apart from that they've not even tried, they've just stopped ringing because  
335 they don't, they just don't see the point anymore.” (VCSEFG1)

336 “The system seems quite complex to navigate, sometimes you've got to ring up and then  
337 listen to something ... some of my families find that really difficult, and they find it so  
338 frustrating. I've actually got a family who are more likely to ring, do a 999, you know, call a  
339 blue light, than actually, you know, ring through for ... a GP appointment.” (VCSEFG2)

340 Contributors in VCSEFG1 also highlighted issues in getting appointments for those working more  
341 than one job, non-standard hours or with inflexible employment terms who might not be able to  
342 take time off work, and for whom time off may result in loss of income. Consequently, parents had  
343 not attended appointments “because they just couldn't get time off work” (VCSEFG1).

### 344 **3.3.3 Dental Appointments**

345 The difficulties of accessing NHS dental care are a national problem that has been highlighted  
346 extensively in national media in recent months. Indeed, many people have little option but to access  
347 dental treatment privately “but that's not the case for people that don't have the money to do that”  
348 (VCSEFG1). However, even NHS treatment is expensive to those on low incomes. ParentInt5  
349 explained that charges might prevent them from seeking treatment: “if I had to pay for that extra  
350 treatment, I wouldn't get it done” (ParentInt5).

351 Moreover, participants in ParentsFG7 reported routinely waiting 12-18 months for appointments for  
352 their children, during which time their oral health had deteriorated and children were in pain. This  
353 scenario was repeated in ParentsFG5, for example: “Trying to get an appointment at the dentist is  
354 like a needle in a haystack. You can’t get one”; “they said I couldn’t get an appointment until next  
355 year”.

356 One VCSE contributor in VCSEFG1 suggested that poor dental health is once more becoming a  
357 marker of poverty.

### 358 **3.3.4 Navigating and negotiating appointments**

359 VCSE contributors commented on the difficulties some families face in navigating and negotiating  
360 health appointments. The health care system was described as a “minefield” involving complicated  
361 referral systems and criteria, and what often feels like arbitrary decision making. The system was  
362 said to be challenging to negotiate even for those with knowledge of it; for families without such  
363 knowledge, it can be debilitating and exhausting, as well as expensive and resource intensive due to  
364 having to make multiple telephone calls and searches for information:

365 “It feels like they’re having to jump through the hoops ... they might be feeling are we at the  
366 bottom of the pile? Or is it just because of COVID? Or is it just that, you know, our needs are  
367 being ignored” (VCSEFG2).

368 VCSEInt1 highlighted people’s inability or reluctance to advocate for their health care and that of  
369 their families as well as poor awareness of what is available to them “so they’re not even accessing  
370 those support and services. You know they’re not asking for the referral.” VCSEInt1 ventured that  
371 few of us are “good at asking for help when we think we should” and most of us “leave it too late,”  
372 but where there are poverty issues “you leave it even later”.

### 373 **3.3.5 Appointment times**



374 Parents commented on the difficulty of getting children to appointments due to having no control  
375 over appointment times. Appointment times determined by health care providers often clashed  
376 with other responsibilities, such as taking other children to school and work. Some preferred  
377 appointments outside the school day to avoid missed education for children, but others preferred  
378 appointments during school times so they did not have to take the whole family with them.

379 ParentInt6, whose child was on a child protection plan, spoke about how hospital appointments  
380 could sometimes clash with requirements of the plan, but hospital appointments were not easy to  
381 change, “a lot of them are ... an afternoon clinic once a month or you have to go to this hospital 16  
382 miles down the road”. VCSEInt1 also commented on the difficulty of altering hospital appointment  
383 times, even where long journeys are involved, “I think you're entirely at the mercy of what comes  
384 through on the letter.”

### 385 **3.3.6 Childcare**

386 Parents talked about challenges in finding suitable childcare so that they or their other children  
387 could attend appointments. Participants in ParentsFG3 talked about the possibility of using breakfast  
388 or after school clubs, but this was more expense. Moreover, several parents reported not having  
389 anyone readily available to provide childcare. This situation was recognised by VCSE contributors  
390 who reported that childcare impacted access to health care for parents and children alike. Both  
391 VCSEFG1 and VCSEFG2 referred to whole families presenting at accident and emergency  
392 departments because they had no one to leave children with.

### 393 **3.4 Relationships with health care providers**

394 Some parents commented on difficulties they had experienced in forming trusting relationships with  
395 health care staff. Not receiving care consistently from the same health care professional and having  
396 to keep “explaining yourself over and over” was a particular issue for parents in ParentsFG7. Parents  
397 offered little comment on health care providers’ responses to poverty beyond recognising and

398 valuing moments where health care staff went out of their way to be helpful – for example, in the  
399 provision of food and drinks.

400 All VCSE contributors were supportive towards health care staff and acknowledged the pressures  
401 facing the NHS, for example: most people’s experiences of “health professionals have been positive;  
402 most people go into the job for the right reasons and are kind, caring and helpful” (VCSEInt1).  
403 Nonetheless, VCSE contributors held concerns over how health care providers respond to poverty:  
404 “organizationally there are obviously some issues” (VCSEFG2).

405 Contributors in VCSEFG2 contemplated whether clinical staff were trained or supported to think  
406 explicitly about poverty; in their experience, where solutions to poverty issues had been presented it  
407 had been “individuals who've done that as opposed to a systemic approach”. VCSEInt1 pointed to  
408 some health care staff that are “authoritative; don't really listen” which they felt was potentially  
409 related to “training issues and recruitment issues in medical school” in that so many “medical  
410 students are from private school” and that “GPs tend not to do their placements in deprived areas”  
411 (VCSEInt1).

412 A contributor in VCSEFG2 pointed to an expectation within health services that patients can comply  
413 with available provision and when they cannot it is seen as a problem with the patient rather than  
414 the system. Another provided an example of when a single parent with four children did not take one  
415 of them to an “urgent appointment” because they had no childcare for the others. Whilst the parent  
416 had been supported to rearrange the appointment their decision prompted involvement from other  
417 services:

418 “So, [they] felt judged that, [they were not] able to get to that particular appointment at the  
419 correct time [because they] had made that decision that, actually, I can't leave my children  
420 alone, and I'm going to have to stay with them.” (VCSEFG2)

421 VCSE contributors also pointed to issues with communications between patients and health care  
422 providers; they perceived that access to health care information was largely determined by an  
423 individual's ability to navigate and communicate with the system, which was particularly challenging  
424 to people with poor literacy, health literacy and digital access/skills. VCSEInt1 highlighted the lack of  
425 services to support people who are "overwhelmed or just don't quite understand or can't cope".

### 426 **3.5 Awareness of financial assistance for health-related costs**

427 There was a general lack of awareness about sources of financial assistance for health-related costs.  
428 The provision of such information appeared arbitrary, with some people gaining awareness by good  
429 fortune and others never becoming aware of it. Participants in ParentsFG7 commented about only  
430 finding out about support services and financial help by chance. ParentInt1 had "no idea about  
431 anything" and could not recall it ever having been mentioned. However, the idea of applying for  
432 assistance appeared burdensome: "If you've got to think about support on top of that to get to  
433 doctors and stuff like that, it's another thing you're having to constantly think about" (ParentInt1).

434 In contrast, ParentInt6 was aware that hospital transport might be available "but you have to be  
435 ready two hours before and you could be waiting up to two hours after", which is not ideal when  
436 taking children. However, they reported that "if you ask about the transport, they can be quite shifty  
437 with you, especially if you're young ... we need to keep it for the older generation, as I've been told"  
438 (ParentInt6).

439 Participants in ParentFG5 described how on many occasions they found out that they were eligible to  
440 financial support with attending healthcare services "only by chance".

441 VCSE informants held little awareness of how to access financial support for health-related costs.  
442 VCSEFG1 pointed to "the amount of time it takes to look for the resource and support you can  
443 access" and commented that people "just don't have the time to do that because you're too busy  
444 trying to live your life; trying to work".

445 **3.6 Suggested improvements**

446 Several suggestions for how to improve access to health care for families living on low incomes were  
447 made.

448 **3.6.1 Financial and practical assistance**

449 ParentInt2 commented on awareness of help with financial costs for health care. They stated that  
450 had they known they were entitled to help due to low-income then they would have claimed but  
451 suggested that although they had read about assistance “in one of the leaflets, for one of the  
452 hospitals”, they were not sure whether they were entitled because “it doesn’t say how, it doesn’t say  
453 in what circumstances”. Therefore, ParentInt2 felt that information on help with health care costs  
454 should be included in letters sent out by health care providers and Universal Credit, something that  
455 says, “If you’re on this benefit, you can be entitled to this.”

456 Other parents suggested ways to help with subsistence. There were many comments about how  
457 hard and humiliating it could be to ask for financial support or for basic necessities to be provided  
458 when parents had to stay in hospital accommodation. Participants in ParentFG3 discussed being  
459 “embarrassed to ask” for things that would help but felt this would be easier if things were offered;  
460 they thought services should “offer, and overly offer.” ParentInt6 suggested providing vouchers to  
461 use at food outlets.

462 VCSE contributors all wanted increased awareness of financial support for health care costs.  
463 Contributors in VCSEFG1 identified knowledge about financial assistance to be a “big problem”.  
464 VCSEInt1 believed that at the very least, people should be made aware of available financial support,  
465 but also about any flexibility there may be around appointment times which would make attendance  
466 cheaper and more achievable. VCSEFG2 suggested awareness of assistance was so low, even  
467 amongst VCSE staff, that research was needed to clarify “what support is available” and for it to  
468 become “habit that health providers include that in their letters”. Both VCSEFG1 and VCSEFG2

469 suggested having leaflets and posters in areas of high footfall, schools, GP surgeries and all health  
470 care settings. Another contributor, in VCSEFG2, mentioned having seen posters on the doors of  
471 supermarket toilets which said “if you struggle to pay for sanitary products just go to customer  
472 service and ask for Sandy or something like that”. The group believed something similar would work  
473 in health care settings.

### 474 **3.6.2 System changes within health care**

475 VCSEInt1 wanted to see more flexibility around appointments times:

476 “Because at the moment we just feel lucky if you get an appointment ... it's such a battle. But  
477 ... if you've got a long journey, and especially if you've got other caring responsibilities or  
478 employment responsibilities, the more flexibility the better.” (VCSEInt1)

479 VCSEFG2 felt that patients should be able to “interact in the way that the doctor surgery wants you  
480 to at no cost.” They also wanted pre-bookable GP appointments made available to families, which  
481 they thought important for planning transport, especially for fitting appointments around the school  
482 day and other children’s care. Furthermore, for parents whose children have health conditions,  
483 getting GP appointments can feel like a constant trial so pre-bookable appointments would ease  
484 their stress: “you know they're going to be going to the doctors in a month’s time. So why not?”

485 VCSEFG1 believed improving access and care for low-income families required “a whole cultural  
486 system shift”. VCSEInt1 highlighted the social and cultural (class) differences between senior health  
487 care professionals (i.e. GPs and consultants) and the communities they serve; they wanted medical  
488 students to experience more placements in deprived areas. In a similar vein, VCSEFG1 called for  
489 improved training for medical staff: “raising awareness about all these different kind of groups that  
490 don't get access and why they don't get access.” VCSEFG2 felt similarly, “training is really important  
491 ... specifically about poverty and how that affects families.” VCSEFG2 admitted to having little  
492 awareness of how much training in poverty issues different health care professionals receive and

493 acknowledged that some professionals are “seeing those issues all the time and [are] really aware of  
494 that”. Nevertheless, they felt training and awareness to be very important.

#### 495 **4. Discussion**

496 The aim of this study was to identify barriers to health care access among families living on low  
497 incomes with the objective of designing an action-plan toolkit for poverty proofing health care  
498 settings used by children and their families. The following discussion summarises how the study has  
499 influenced the approach taken by CNE.

500 As a consultative model Poverty Proofing© Health (PPH) is grounded in the same ethos, principles  
501 and methodology as Poverty Proofing© the school day (table 1). However, the audit process for PPH  
502 has a wider training remit and a consultation phase that extends beyond the voice of the child to  
503 include a diverse range of people. This research provided evidence to strengthen CNE’s existing audit  
504 approach to PPH, especially in the areas of staff training and suggested improvements, and the  
505 themes identified resonated with those CNE see in practice.

506 **Table 1. Ethical principles of Poverty Proofing©**

|                                |                                                                                                                                                          |
|--------------------------------|----------------------------------------------------------------------------------------------------------------------------------------------------------|
| <b>Voice</b>                   | To achieve real social change it is imperative that the voice of those affected by poverty is central to understanding and overcoming the barriers faced |
| <b>Place</b>                   | Alongside hearing from people, the context of the community and place needs to be understood                                                             |
| <b>Structural inequalities</b> | Structural changes at an organisational level can be addressed or at least alleviated by eliminating the barriers that those in poverty face             |

507

508 Following the research phase, CNE completed several PPH audits across different health care

509 settings (including GP Surgeries, Maternity services, Outpatients, Paediatric Diabetes, Palliative Care,  
510 Sexual Health and Speech and Language). Whilst the terminology differed across settings there were  
511 clear similarities between the thematic areas emerging in the audits and those identified in the  
512 research (see table 2). This developed our thinking beyond an action-plan toolkit and led us to  
513 develop a 'Common Themes Framework'. The framework presents CNE and the PPH audit process  
514 with a systematic, intelligence-led approach that underpins and sits across each of the five phases of  
515 the PPH audit process. How this translates into practice is explored next.

516 **Table 2. Thematic Areas in Poverty Proofing© Health**

|                                          |                                                                                                                                                                                                                               |
|------------------------------------------|-------------------------------------------------------------------------------------------------------------------------------------------------------------------------------------------------------------------------------|
| <b>Travel</b>                            | Affordability; convenience; transport poverty                                                                                                                                                                                 |
| <b>Navigating &amp; Negotiating</b>      | Hidden costs; systems and processes; policy and<br>procedure                                                                                                                                                                  |
| <b>Appointments</b>                      |                                                                                                                                                                                                                               |
| <b>Communication</b>                     | Digitisation & digital inclusion; health literacy; responsivity<br>to communication preferences, language and cultural<br>support                                                                                             |
| <b>Staff awareness</b>                   | Staff knowledge, awareness and understanding of socio-<br>economic circumstances and how to help; partnership<br>arrangements and joined up working; culture, behaviour<br>and attitudes of staff; practical help and support |
| <b>Patient Empowerment</b>               | Patient voice and participation; access to support and<br>education; patient perceptions                                                                                                                                      |
| <b>The additional costs of being ill</b> | Specialist equipment; food and fuel costs, therapeutic,<br>wellbeing and associated costs                                                                                                                                     |

517

## 518 **5.1 The Development of a Common Themes Framework**

519 A PPH audit has five phases, these are: (i) training and initial consultation with health care staff; (ii)  
520 scoping of the setting and how it works in practice; (iii) patient and community consultation; (iv)  
521 comprehensive report with recommendations; (v) review. In this section, we explain each phase,  
522 show how the common themes and suggested improvements that emerged in the research were  
523 integrated, and the impact this had.

#### 524 **5.1.1 Training**

525 Research participants felt health care staff would benefit from training, specifically about poverty  
526 and how it affects families. Whilst PPH always contained training, this phase has been revised to  
527 embed the common themes with the aim of raising awareness amongst health care staff of the  
528 barriers people face in accessing health care (i.e., travel, subsistence, accessing appointments,  
529 navigating the health system and relationships with health care providers). Facilitated consultation  
530 at the end of training sessions allows CNE coordinators to frame the consultation around these  
531 common themes and to draw out how staff experience the challenges of poverty in their work. This  
532 is essential to co-production, building relationships and understanding both structural barriers and  
533 the challenges staff face in delivering poverty informed services.

534

#### 535 **5.1.2 Scoping**

536 A set of prompts, relating to the research themes, have been designed and implemented to ensure  
537 PPH coordinators are informed and consistent in observations, conversations and paper-based  
538 enquiries whilst scoping and orienting the work in relation to each setting. Our scoping now includes  
539 gaining an awareness of the health care setting's policies, processes and procedures that are most  
540 likely to impact families on low incomes (such as discharge policies and travel reimbursement  
541 schemes) and unpicking the mechanisms for signposting to support services, appointment booking  
542 systems and so on. This activity helps to discern between what is fact, what is policy and what is  
543 perception in both staff and members of the public.



544 **5.1.3 Consultations**

545 The 'Common Themes Framework' also feeds into the way questions are posed during community  
546 consultations to emphasise those issues amplified by living on a low income and navigate away from  
547 questions that focus on challenges relating to those wider NHS pressures that most people  
548 experience, irrespective of income. The questions are designed to ensure that all common themes  
549 are addressed in a systematic way, whilst also allowing space for new themes and underdeveloped  
550 areas to emerge.

551 **5.1.4 Feedback & Reporting**

552 A key feature of feedback and reporting is making recommendations and suggested improvements  
553 based on the findings from the PPH audit. CNE use a strengths-based approach that specifically seeks  
554 out what is working well in each setting and how it supports people living with poverty, as well as  
555 understanding the challenges and barriers to doing this. The improvements suggested by research  
556 participants are now included in a growing bank of recommendations that are drawn on when  
557 feeding back to organisations. PPH is delivered at place and the breadth and geography of settings  
558 means recommendations cannot be standardised or generalizable. However, having a bank of  
559 recommendations helps with efficacy and consistency where findings are similar. For example, travel  
560 is a topic that arises frequently. Therefore, understanding that the NHS low-income scheme includes  
561 travel reimbursement and ensuring the process for this is shared clearly and personally is one  
562 practical example of how health care staff can help close the travel inequality gap. Another is around  
563 asking about finances, universally, as part of patient care as a way of opening up the conversation so  
564 the right support can be identified. If this question is not asked health care staff can be unaware of  
565 patients' financial difficulties and this can lead to assumptions, unconscious bias and missed  
566 opportunities to provide support.

567 **5.1.5 Impact and Monitoring**

568 The 'Common Themes Framework' is reflexive in its nature and there is space within it to respond

569 and grow to accommodate new knowledge and themes as they emerge. Structuring each audit  
570 around common themes means findings can be quantified and analysed by locality, theme and  
571 setting type. This then contributes to a broader framework of monitoring impact at scale, providing  
572 insight into common themes that contribute to health inequality in a way that can be pinpointed and  
573 articulated to policy and decision makers.

## 574 **5. Conclusion**

575 Current pressures on the UK's NHS have resulted in access to health care being challenging to almost  
576 all who use it. For those living on low incomes these challenges are exacerbated in many ways, as  
577 demonstrated by this research. Our findings show that despite NHS services being free at the point  
578 of delivery, low income can be a barrier to accessing health care. Poverty restricts access to health  
579 care for children and perpetuates inequities in health, education and life opportunities. These  
580 barriers are not inevitable. The findings of this research have informed CNE's approach to working  
581 with health care providers to help them reduce the impacts poverty has on health care access using  
582 their 'Poverty Proofing© Health audit approach'. The development of a 'Common Themes  
583 Framework' ensures audits across different settings are consistent, replicable, systematic and  
584 intelligence led.

## 585 **Acknowledgements**

586 The authors wish to acknowledge the parent and VCSE participants who contributed to this study  
587 and the VCSE organisations who helped us engage with families. We would also like to thank Lorna  
588 Nicoll from CNE for proofreading this paper.

## 589 **Research Data**

590 Due to the sensitive nature of the questions asked in this study and personal information shared, as  
591 well as our ethics approval, research participants were assured raw data would remain confidential  
592 and would not be shared.

593 **Funding**

594 The study was funded by the National Institute for Health and Care Research (NIHR) Applied  
595 Research Collaboration (ARC) North East and North Cumbria (NIHR200173). The NIHR ARC NENC  
596 played no role in the collection, analysis and interpretation of data, writing of the report, and in the  
597 decision to submit the article for publication; the views expressed are those of the author(s) and not  
598 necessarily those of the NIHR or the Department of Health and Social Care.

599

600 **References**

- 601 [1] D'Arcy C, Goulden C. A definition of poverty. Joseph Rowntree Foundation. 2012. Available from:  
602 <https://www.jrf.org.uk/report/definition-poverty>.
- 603 [2] Mon-Williams M, Wood ML, et al. (2023). Addressing Education and Health Inequity: Perspectives  
604 from the North of England. A report prepared for the Child of the North APPG [Internet]. 2023 [cited  
605 13 September 2023]. Available from: [https://www.healthequitynorth.co.uk/app/uploads/APPG-](https://www.healthequitynorth.co.uk/app/uploads/APPG-REPORT-SEPT-23.pdf)  
606 [REPORT-SEPT-23.pdf](https://www.healthequitynorth.co.uk/app/uploads/APPG-REPORT-SEPT-23.pdf).
- 607 [3] Wickham S, Anwar, E, Barr B, Law C, Taylor-Robinson D. Poverty and child health in the UK: using  
608 evidence for action. Arch. Dis. Child. 2016; 101(8):759–766. [https://doi.org/10.1136/archdischild-](https://doi.org/10.1136/archdischild-2014-306746)  
609 [2014-306746](https://doi.org/10.1136/archdischild-2014-306746).
- 610 [4] Wykes T, Bell A, Carr S, Coldham T, Gilbody S, Hotopf M, et al. Shared goals for mental health  
611 research: What, why and when for the 2020s. J Ment Health [internet]. 2021 March [cited 9 August  
612 2023]. <https://doi.org/10.1080/09638237.2021.1898552>.
- 613 [5] Rod NH, Bengtsson J, Budtz-Jorgensen E, Clipet-Jensen C, Taylor-Robinson D, Nybo A, et al.  
614 Trajectories of childhood adversity and mortality in early adulthood: a population-based cohort  
615 study, Lancet. 2020;396(10249):489-497. [https://doi.org/10.1016/S0140-6736\(20\)30621-8](https://doi.org/10.1016/S0140-6736(20)30621-8)

- 616 [6] Dyer F. The Good Childhood Report, Supporting the well-being of children and young people, a  
617 worship resource for churches and church groups. The Children's Society [Internet]. 2019 [cited 9  
618 August 2023]. Available from: [https://southwark.anglican.org/wp-content/uploads/2020/12/Good-](https://southwark.anglican.org/wp-content/uploads/2020/12/Good-Childhood-Whole-Church.pdf)  
619 [Childhood-Whole-Church.pdf](https://southwark.anglican.org/wp-content/uploads/2020/12/Good-Childhood-Whole-Church.pdf).
- 620 [7] Bidmead E, El Zerbi C, Cheetham M Frost S. A rapid review of children and young people's views  
621 of poverty and welfare in the context of Universal Credit. Child Soc 00. [Preprint] 2023. Available  
622 from: <https://doi.org/10.1111/chso.12728>.
- 623 [8] Child Poverty Action Group, Child Poverty Facts and Figures [Internet]. 2023 [cited 9 August  
624 2023]. Available from: <https://cpag.org.uk/child-poverty/child-poverty-facts-and-figures>.
- 625 [9] North East Child Poverty Commission, New government figures show North East child poverty  
626 remains shockingly high [Internet]. 2023 [cited 9 August 2023]. Available from:  
627 <https://nechildpoverty.org.uk/>.
- 628 [10] Pickett K, et al. Child of the North: Building a fairer future after COVID-19. 2021. Northern Health  
629 Science Alliance and N8 Research Partnership [Internet]. 2021 [cited 9 August 2023]. Available from:  
630 <https://www.thenhsa.co.uk/app/uploads/2022/01/Child-of-the-North-Report-FINAL-1.pdf>.
- 631 [11] Mazzoli Smith L, Todd L. Poverty proofing the school day: evaluation and development report  
632 [Internet] 2016 [cited 9 August 2023]. Available from:  
633 [https://eprints.ncl.ac.uk/file\\_store/production/232454/86F983AD-4159-4FE1-9F37-](https://eprints.ncl.ac.uk/file_store/production/232454/86F983AD-4159-4FE1-9F37-3B567F2182C2.pdf)  
634 [3B567F2182C2.pdf](https://eprints.ncl.ac.uk/file_store/production/232454/86F983AD-4159-4FE1-9F37-3B567F2182C2.pdf).
- 635 [12] Morris S, Sutton M, Gravelle H. Inequity and inequality in the use of health care in England: an  
636 empirical investigation. Soc Sci Med 60(6), (2005) 1251–1266.  
637 <https://doi.org/10.1016/j.socscimed.2004.07.016>.
- 638 [13] Cookson R, Propper RC, Asaria M, Raine R. Socio-Economic Inequalities in Health Care in  
639 England, Fisc Stud 37(3-4), (2016) 371–403. <https://doi.org/10.1111/j.1475-5890.2016.12109>.

640 [14] Francis-Devine B. Research Briefing: Poverty in the UK: statistics, House of Commons Library

641 [Internet] 2023 [cited 9 August 2023]. Available from:

642 <https://commonslibrary.parliament.uk/research-briefings/sn07096/>.

643 [15] Tong A, Sainsbury P, Craig J. Consolidated criteria for reporting qualitative research (COREQ): a

644 32-item checklist for interviews and focus groups. *Int J Qual Health Care*. 2007 19(6):349 – 357.

645 <https://doi.org/10.1093/intqhc/mzm042>.

646 [16] Braun V, Clarke V. *Thematic analysis: a practical guide*. Los Angeles: SAGE; 2021.
